# Supplementary material for: The secreted purple acid phosphatase isozymes AtPAP12 and AtPAP26 play a pivotal role in extracellular phosphate-scavenging by Arabidopsis thaliana
Source: PubMed Central journal article supplement — J Exp Bot. 2012 Nov 8;63(18):6531–42. doi: 10.1093/jxb/ers309 (PMC3504502; doi:10.1093/jxb/ers309), 2012-11-08

**The secreted purple acid phosphatase isozymes AtPAP12 and AtPAP26 play a pivotal role in extracellular phosphate-scavenging by *Arabidopsis thaliana***

W.D. Robinson, J. Park, H.T Tran, H.A. Del Vecchio, S. Ying, J.L Zins, K. Patel, T.D. McKnight, and W.C. Plaxton

**Supplementary Fig. S1.** Confirmation of T-DNA insert location and loss of *AtPAP12* and/or *AtPAP26* gene expression in *atpap12*, *atpap26*, and *atpap12/atpap26* mutants. A. Schematic representation of the *AtPAP26* and *AtPAP12* genes; white boxes and solid lines represent exons and introns, respectively. T-DNA insertion locations are indicated by *atpap12* and *atpap26* T-DNA, while arrows represent primers (B) used for RT-PCR and genotyping. C, Assessment of T-DNA location and homozygosity of mutants via PCR-based screening of gDNA template isolated from leaves of +P<sub>i</sub> soil grown seedlings. PCR products were amplified using *AtPAP26*-specific primers (primer pair A+B) and *AtPAP12*-specific primers (primer pair C+D) from the Col-0, *atpap26*, *atpap12*, and *atpap26/atpap12* gDNA. The lack of the *AtPAP26* DNA band in *atpap26* and *atpap26/atpap12* demonstrates that the mutant is homozygous. Comparable results were obtained with the *atpap12* mutant, where the *AtPAP12* DNA band was absent in both the *atpap12* and *atpap26/atpap12* mutants. T-DNA insertion positions were confirmed using a left-border primer (LBb1.3 and LB3) and gene specific primers (A and C) respectively for *atpap26* and *atpap12* mutants.

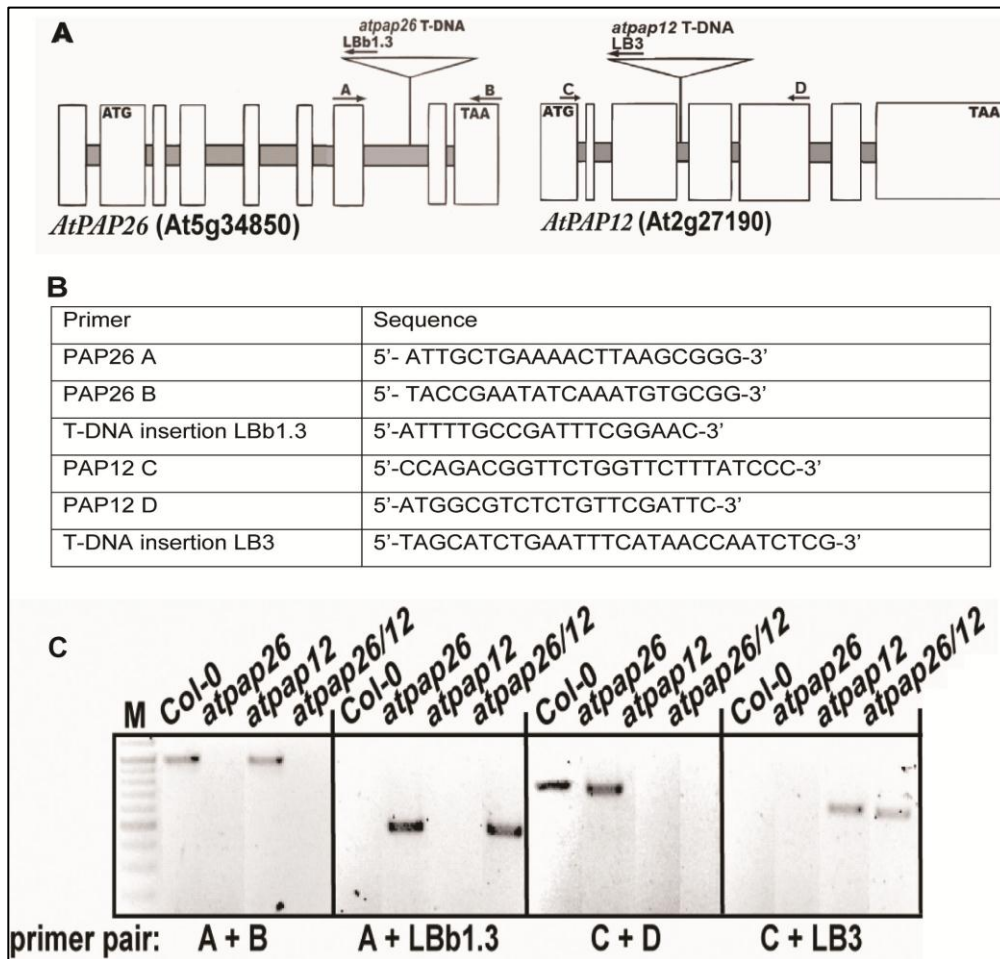

**Supplementary Fig. S2.** Histochemical staining of root surface APase activity in Col-0 and *atpap12/atpap26* seedlings using  $\beta$ -naphthyl-P or BCIP. Plants were cultivated for 2 weeks on vertically oriented agar plates containing 0.5x MS media, 1% (w/v) sucrose, and 50  $\mu$ M Pi before staining. A. Roots were rinsed in sodium acetate buffer (0.1 mM, pH 5.0) and covered with an agarose substrate mixture containing 200 mM acetate buffer, pH 5.0, 0.2% (w/v)  $\beta$ -naphthyl-P, and 0.2% (w/v) diazo blue B (O-dianisidine tetrazotized) (Gilbert *et al.*, 1999); a dark purple/red color indicates APase activity. B. Root segments were embedded in an agarose substrate mixture containing 0.01% (w/v) BCIP (Wang *et al.*, 2011); the blue color indicates APase activity. Images shown in panel A and B are representative of at least three biological replicates; scale bar = 1 cm.

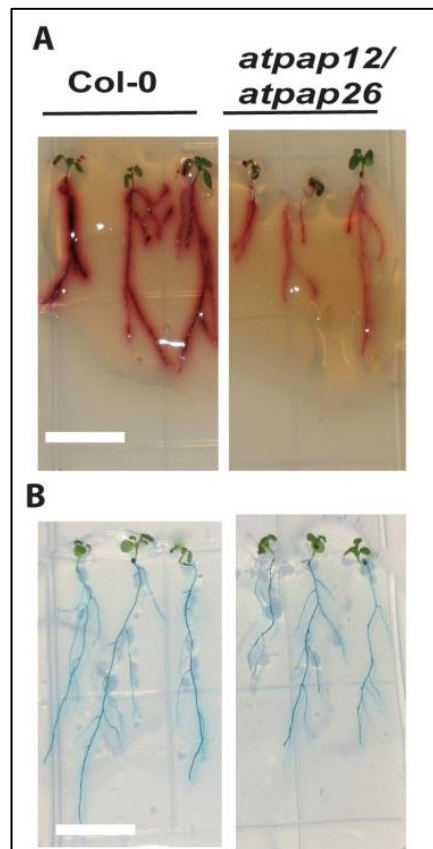



**Supplementary Fig. S4.** Influence of nutrient deprivation or oxidative stress on growth of *atpap12/atpap26* and Col-0 seedlings. Shoot fresh weight of seedlings cultivated on horizontal agar plates containing 1.5 mM  $P_i$  for 7-d, then grown for an additional 7-d on media containing 1.5 mM or 50  $\mu$ M  $P_i$  (+ $P_i$  and - $P_i$ , respectively), or on + $P_i$  media lacking nitrogen (-N) or potassium (-K), or containing 1  $\mu$ M paraquat (PQ). All values represent means  $\pm$ SE of  $n = 12$  different seedlings from four different plates; asterisks denote values that are significantly different from Col-0 ( $P < 0.01$ ).

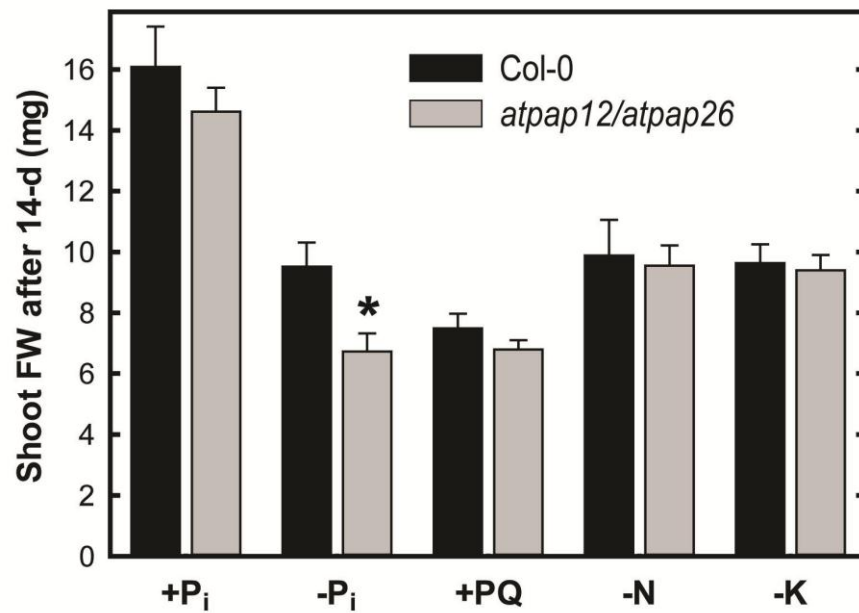

**Supplementary Fig. S5.** Immunoblot analysis of AtPAP12 and AtPAP26 polypeptides in clarified rosette extracts of 21-d-old Arabidopsis plants cultivated in  $-P_i$  soil. The *atpap12/atpap26* double mutant was backcrossed with *atpap12* and *atpap26* single mutants to restore the expression of AtPAP26 and AtPAP12, respectively (for details see text and legend for Fig. 5). Protein extracts (5  $\mu$ g/lane) as well as homogeneous native AtPAP12 and AtPAP26 (50 ng each) (Tran *et al.*, 2010a) were subjected to immunoblotting using anti-AtPAP12 as described in the Materials and Methods.

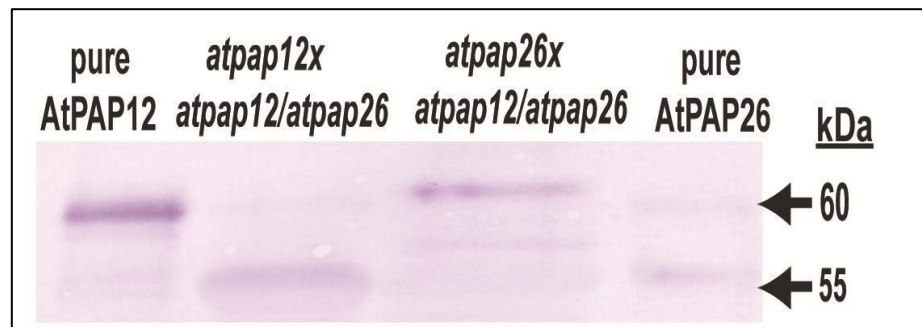

**Supplementary Fig. S6.** A classification scheme for Arabidopsis PAPs based on clustering analysis of amino acid sequences. The main groups (groups I, II, and III) are further divided to yield the 8 subgroups (second column). The bootstrap values for the three main groups are boxed, whereas those for the 8 subgroups are indicated by arrows. The predicted molecular masses of the deduced polypeptides are listed in the third column. Figure modified from Li *et al.* (2002).

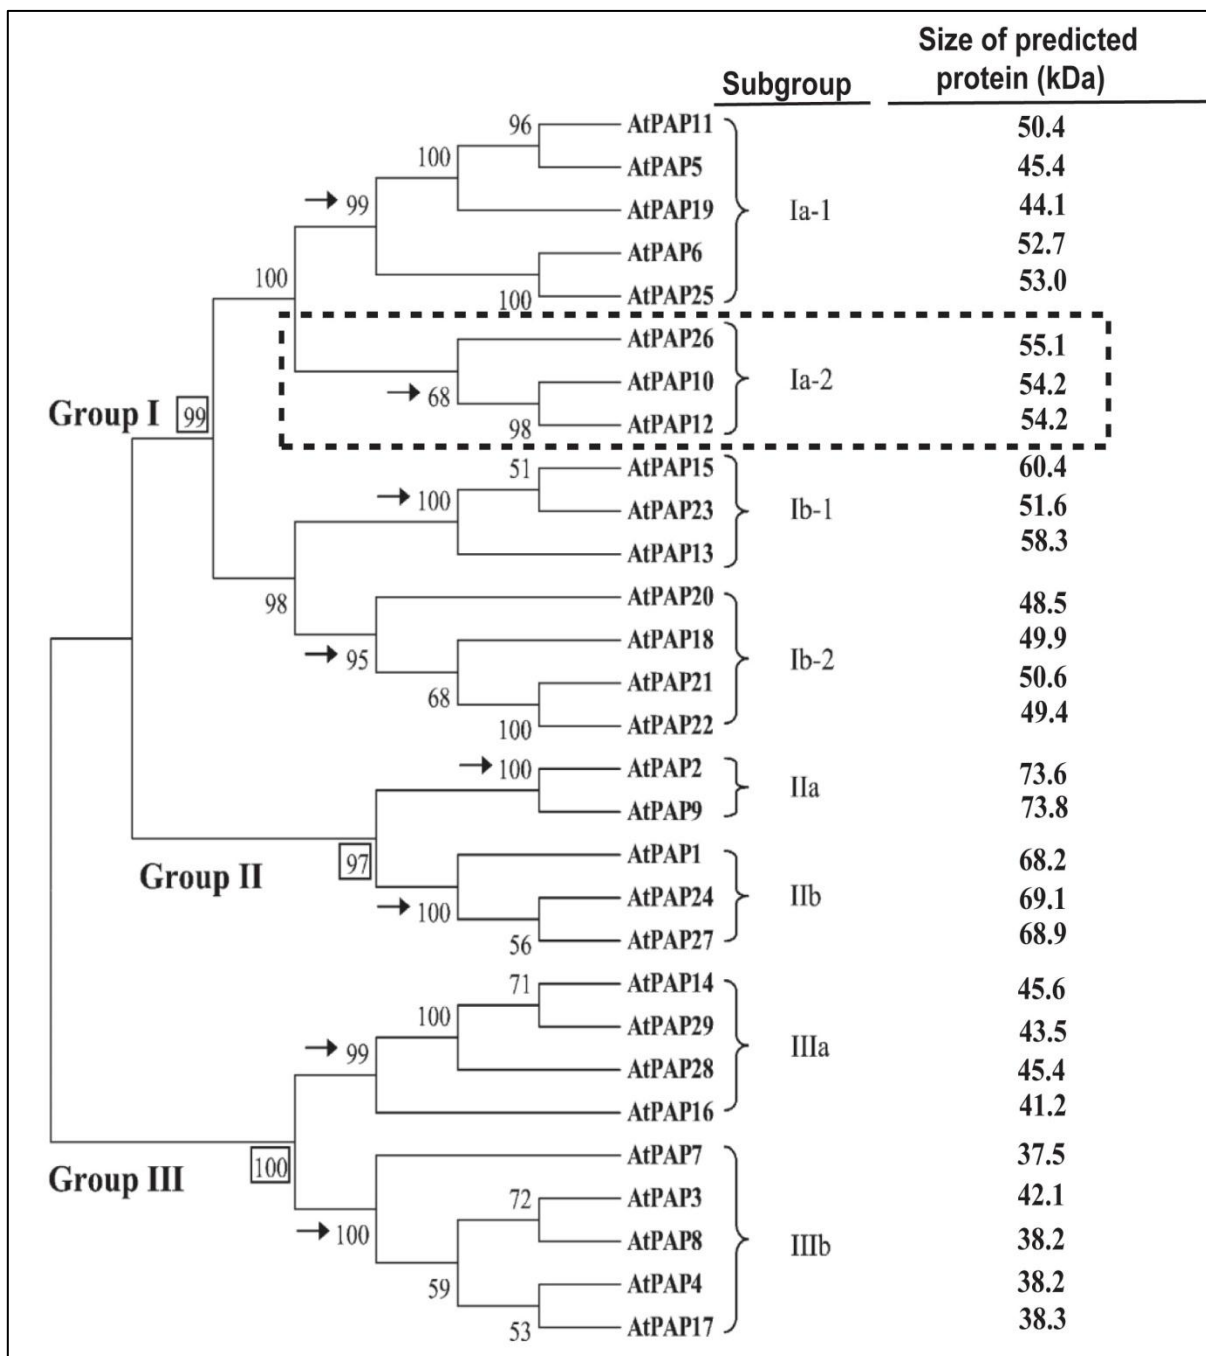

Supplement: supp_ers309_jexbot086934_file001.pdf [file supp_ers309_jexbot086934_file001.pdf]
